# Supplementary material
Source: Springer Nature journal article supplement (https://www.springermedizin.de/resource/supplementary/12885_2012_3710_MOESM5_ESM.pdf/9465958)

**A**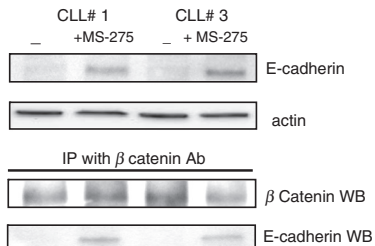**C**

| CLL    | % LEF transcript inhibition with MS-275 | % Cyclin D1 transcript inhibition with MS-275 |
|--------|-----------------------------------------|-----------------------------------------------|
| CLL#1  | 39                                      | 30                                            |
| CLL#2  | 39                                      | ND                                            |
| CLL#3  | 43                                      | ND                                            |
| CLL#4  | 47                                      | 60                                            |
| CLL#5  | No inhibition                           | No inhibition                                 |
| CLL#6  | 57                                      | 25                                            |
| CLL#7  | 65                                      | 40                                            |
| CLL#8  | No inhibition                           | 38                                            |
| CLL#9  | 65                                      | 30                                            |
| CLL#10 | 25                                      | 35                                            |

**B**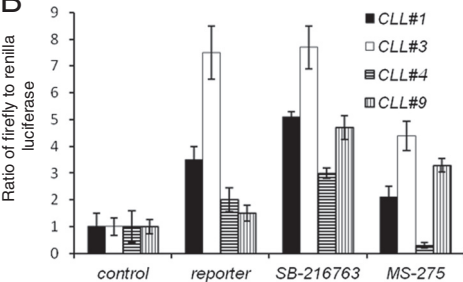**D**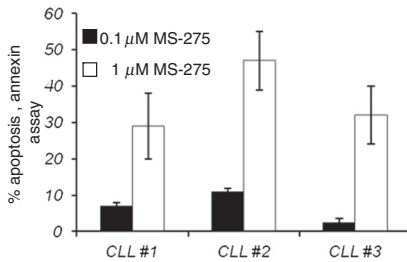

Supplement: MOESM5 [file 9465958]
